# Supplementary material for: Transglutaminase Type 2 regulates the Wnt/β-catenin pathway in vertebrates
Source: PubMed Central journal article supplement (PMC7935911; doi:10.1038/s41419-021-03485-2), 2021-03-05
Supplement: 41419_2021_3485_MOESM1_ESM.pdf [file 41419_2021_3485_MOESM1_ESM.pdf]

A

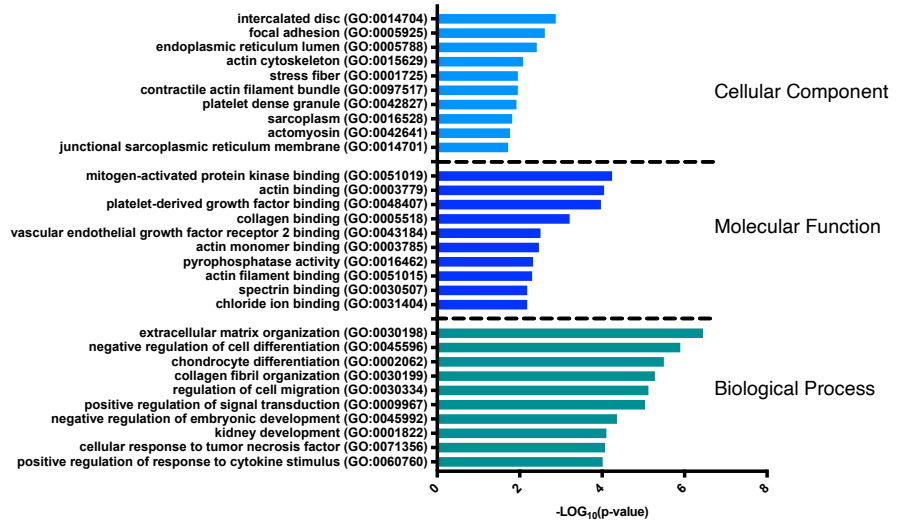

B

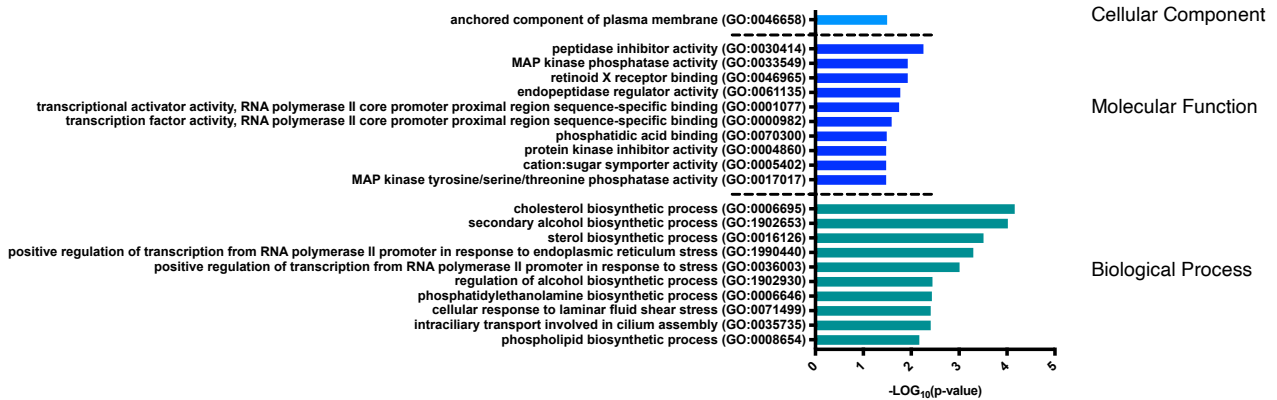

**Supplementary Fig. S1 A-B** Gene ontology (GO) terms (expressed as  $-\text{LOG}_{10}(\text{p-value})$ ) with the highest significance are shown. GO analysis of transcripts enriched in significantly downregulated (A) and upregulated (B) genes in KO MEFs compared to WT.

A

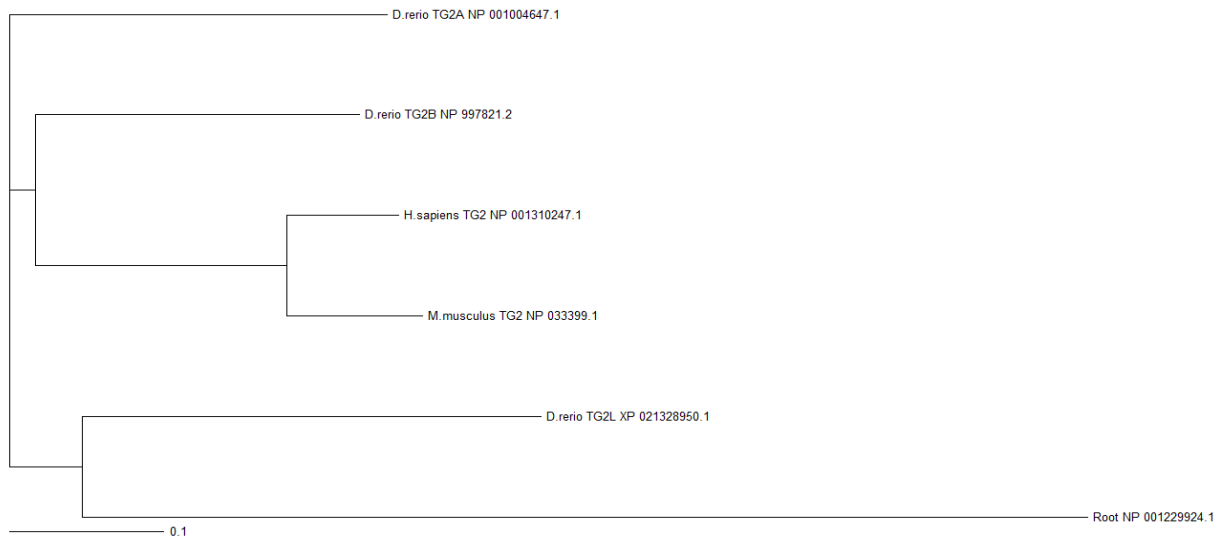

B

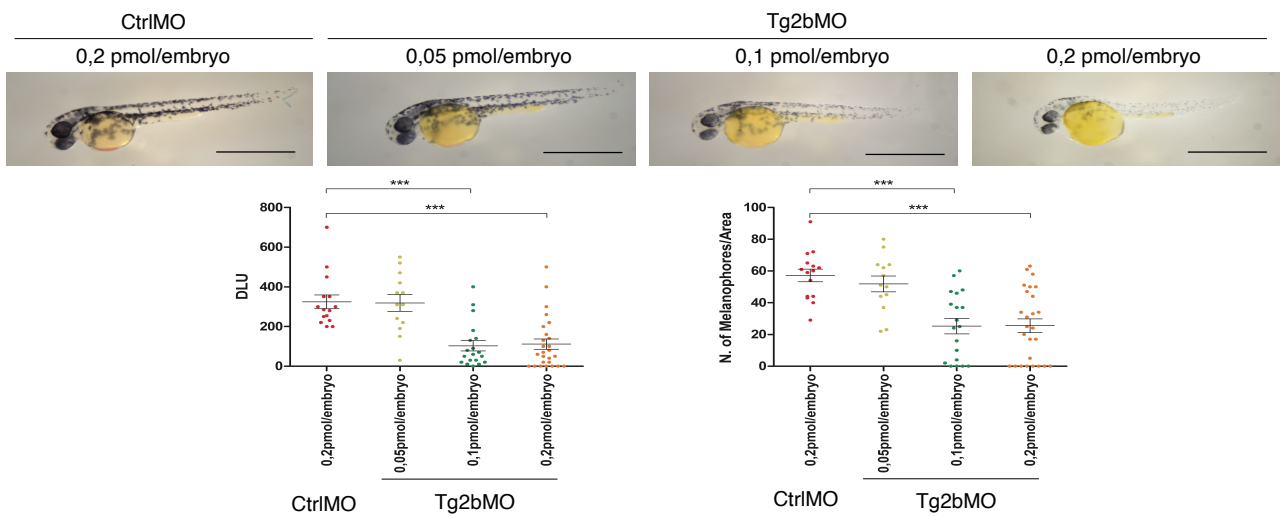

**Supplementary Fig. S2** **A** N-J multialignment of *Danio rerio* TG2 paralogous proteins were compared and analyzed with murine and human TG2. Rooted phylogenetic cladogram is shown. Zebrafish zTg2b is the protein more similar to the human orthologous. **B** Knockdown of the zTg2b was performed by injecting three increasing dosages of morpholinos (0.05, 0.1 and 0.2 pmol). Pigmentation of embryos was analyzed by bright field microscopy. Graphs report the whole number of melanophores for each embryo (right panel) and the quantification of black pixels in the pictures (DLU, left panel) (means  $\pm$  SEM, \*\*\*= $p < 0.001$ ). Bars: 1mm.

A

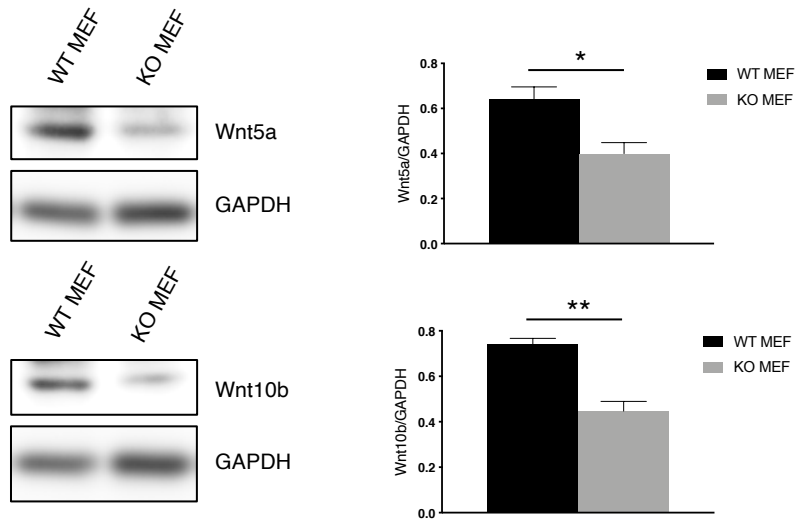

B

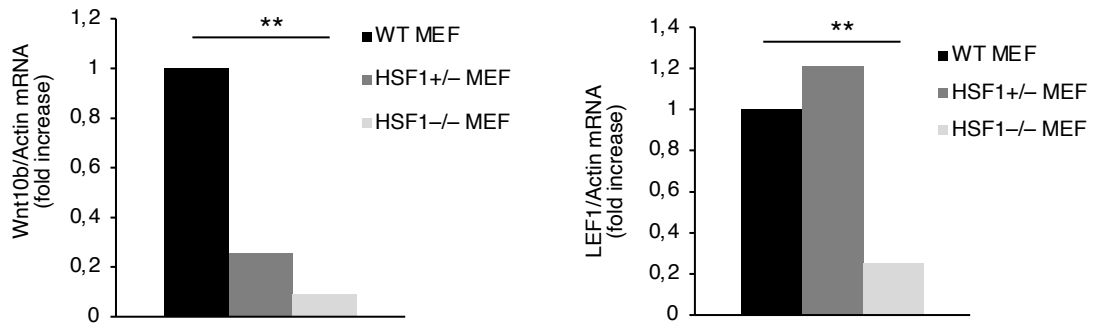

**Supplementary Fig. S3** **A** Representative western blot and densitometric analysis of Wnt5a and Wnt10b in WT and KO MEFs. GAPDH was used as loading control (n =3; means ± SEM; \*p<0.05; \*\*p<0.01). **B** Wnt10b and LEF1 mRNA levels, quantified by qPCR, in WT, HSF1<sup>+/-</sup> and HSF1<sup>-/-</sup> MEFs. (n =3; means ± SEM; \*\*p<0.01).

A

| Protein IDs | Protein names                                                                                 | Gene names | Involvement in the WNT pathway                                                    |
|-------------|-----------------------------------------------------------------------------------------------|------------|-----------------------------------------------------------------------------------|
| A6H6D1      | Dapper homolog 1                                                                              | Dact1      | Regulates $\beta$ -catenin activity (Yuan et al., 2012)                           |
| Q91Z58      | Double-stranded RNA-specific editase 1                                                        | Adarb1     | Loss of Adarb1 induces altered expression in WNT targets (Qiu et al., 2013)       |
| D3YYL1      | B-cell CLL/lymphoma 7 protein family member B                                                 | Bcl7b      | Negatively regulates the Wnt-signaling pathway (Uehara et al., 2015)              |
| Q9JIX0      | Transcription and mRNA export factor ENY2                                                     | Ery2       | Inhibits WNT pathway (Nardi et al., 2018)                                         |
| H3BJR8      | Forkhead box protein P1                                                                       | Foxp1      | Inhibits/potentiates WNT and autophagy (Wang et al., 2019)                        |
| B1AQR8      | Galectin                                                                                      | Lgals9     | Involved in the WNT pathway (Salim et al., 2015)                                  |
| A2ASR6      | Polycomb complex protein BMI-1                                                                | Bmi1       | Promotes cell proliferation and WNT/ $\beta$ -catenin signaling (Yu et al., 2018) |
| O35730      | E3 ubiquitin-protein ligase RING1                                                             | Ring1      | Activates the WNT pathway (Zhu et al., 2019)                                      |
| A0A0G2JG60  | SWI/SNF-related matrix-associated actin-dependent regulator of chromatin subfamily D member 3 | Smarcd3    | Induces the WNT5a (Jordan et al., 2013)                                           |
| Q6P8X6      | Putative ubiquitin carboxyl-terminal hydrolase 50                                             | Usp50      |                                                                                   |
| Q569U6      | Transcription factor jun-B                                                                    | Junb       |                                                                                   |
| F8WGO9      | BTB/POZ domain-containing adapter for CUL3-mediated RhoA degradation protein 3                | Kctd10     |                                                                                   |
| Q9D8M4      | 60S ribosomal protein L7-like 1                                                               | Rpl7l1     |                                                                                   |
| H3BJB6      | T-complex protein 1 subunit theta                                                             | Cct8       |                                                                                   |
| Q8BMA8      | Elongation factor 2                                                                           | Eef2       |                                                                                   |
| Q8CBY8      | Dynactin subunit 4                                                                            | Dctn4      |                                                                                   |

B

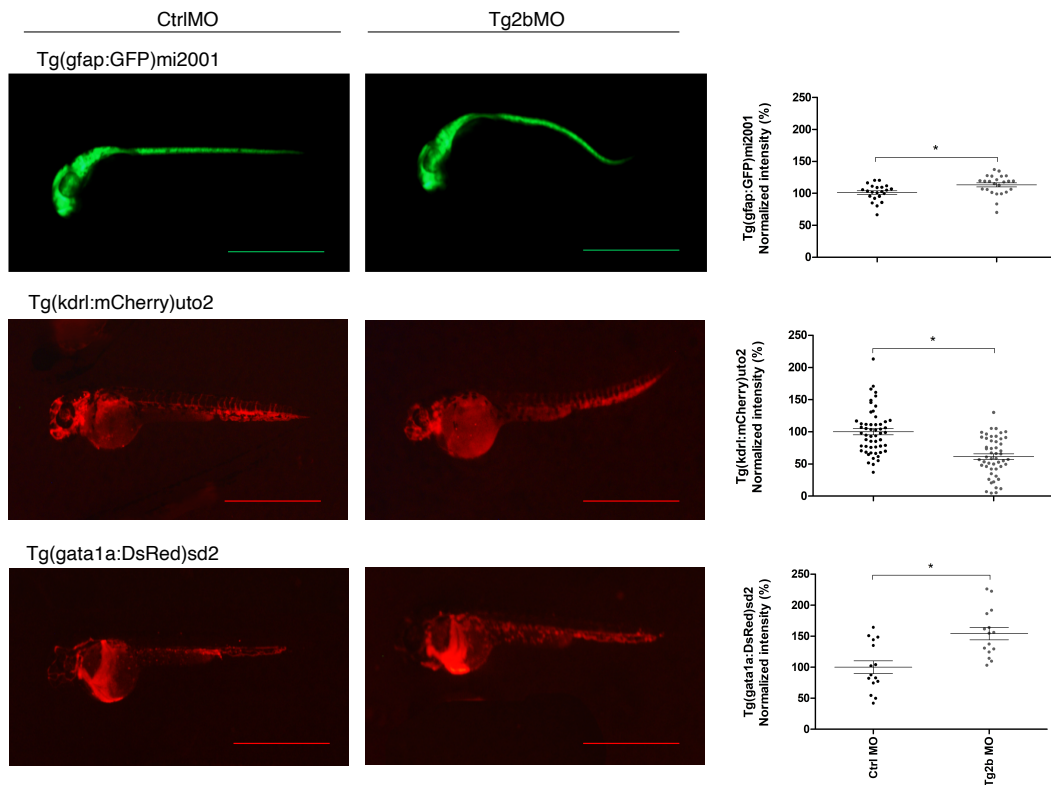

**Supplementary Fig. S4 A** List of the transcriptional factors identified in the TG2 interactome and characterization of the ones involved in the Wnt signaling. The protein complex containing TG2 and its interacting partners was obtained after immunoprecipitation of nuclear TG2 in WT MEFs, separation by HPLC and identification by mass spectrometry. **B** Knockdown of the zTg2b was performed in Tg(gfap:eGFP)mi2001, Tg(Kdrl:mCherry)uto2, Tg(Gata1:DsRed)sd2 and

compared to the control. The images are representative of different embryos. GFP epifluorescence quantification was reported in the graphs on the right. Dots represent treated embryos (means  $\pm$  SEM; \*= $p < 0.05$ ). Bars: 1 mm.
